# Supplementary material
Source: ML conference proceedings conference paper supplement (https://proceedings.neurips.cc/paper_files/paper/2019/hash/465636eb4a7ff4b267f3b765d07a02da-Abstract.html)
Supplement: Supplementary file [file 465636eb4a7ff4b267f3b765d07a02da-Supplemental.zip]

## 376 A Appendix

### 377 A.1 Proof of Theorem 1

378 **Theorem 1.** For any sample  $S = (x_1, \dots, x_m)$ , the empirical Rademacher complexity of a hypothesis  
 379 set  $\mathcal{H}$  is defined by  $\hat{\mathfrak{R}}_S(\mathcal{H}) = \mathbb{E}_{\sigma} [\sup_{h \in \mathcal{H}} \sum_{i=1}^m \sigma_i h(x_i)]$ , where,  $\sigma_i$ s,  $i \in [m]$ , are independent  
 380 uniformly distributed random variables taking values in  $\{-1, 1\}$ . The following upper bound holds  
 381 for the empirical Rademacher complexity of  $\mathcal{H}_{n,\lambda,q}$ :

$$\hat{\mathfrak{R}}^S(\mathcal{H}_{n,\lambda,q}) \leq \lambda \sqrt{\frac{(4n+2) \log_2(d+2) \log(m+1)}{m}},$$

382 where  $d$  is input data dimension.

383 *Proof.* For the purpose of this proof, let  $\mathcal{H}_n$  be the family of binary decision trees with leaf values  
 384  $w_j \in \{-1, +1\}$ . We use the regularization in the family  $\mathcal{H}_{n,\lambda,q}$  and the connection to the family  
 385  $\mathcal{H}_n$  in the proof below. Additionally, let  $r \geq 1$  such that  $\frac{1}{r} + \frac{1}{q} = 1$ , meaning that the  $r$ -norm is  
 386 the dual to the  $q$ -norm. To aid the presentation in the proof, we are going to define a vector  $\hat{\sigma}$  s.t.  
 387  $[\hat{\sigma}]_j = \sum_{x_i \in \text{leaf}_j} \sigma_i$ , the  $j$ -th coordinate of which contains the sum of the Rademacher variables that  
 388 correspond to the sample points that fall within  $j$ -th leaf of a tree  $h$ .

$$\hat{\mathfrak{R}}^S(\mathcal{H}_{n,\lambda,q}) = \frac{1}{m} \mathbb{E}_{\sigma} \left[ \sup_{h \in \mathcal{H}_{n,\lambda,q}} \left[ \sum_{n=1}^m \sigma_n h(x_n) \right] \right] \quad (12)$$

$$= \frac{1}{m} \mathbb{E}_{\sigma} \left[ \sup_{h \in \mathcal{H}_{n,\lambda,q}} [\hat{\sigma} \cdot \mathbf{w}] \right] \quad (13)$$

$$\leq \frac{1}{m} \mathbb{E}_{\sigma} \left[ \sup_{h \in \mathcal{H}_{n,\lambda,q}} \|\hat{\sigma}\|_r \|\mathbf{w}\|_q \right] \quad (14)$$

$$\leq \frac{\lambda}{m} \mathbb{E}_{\sigma} \left[ \sup_{h \in \mathcal{H}_n} \|\hat{\sigma}\|_r \right] \quad (15)$$

$$\leq \frac{\lambda}{m} \mathbb{E}_{\sigma} \left[ \sup_{h \in \mathcal{H}_n} \|\hat{\sigma}\|_1 \right] \quad (16)$$

$$= \frac{\lambda}{m} \mathbb{E}_{\sigma} \left[ \sup_{h \in \mathcal{H}_n} \sum_{i=1}^n |[\hat{\sigma}]_i| \right] \quad (17)$$

$$= \frac{\lambda}{m} \mathbb{E}_{\sigma} \left[ \sup_{h \in \mathcal{H}_n} \sum_{l \in \text{leaves}(h)} \left| \sum_{i=1}^m \sigma_i 1_{\{x_i \in l\}} \right| \right] \quad (18)$$

$$\leq \frac{\lambda}{m} \mathbb{E}_{\sigma} \left[ \sup_{h \in \mathcal{H}_n, s_l \in \{+1, -1\}} \sum_{l \in \text{leaves}(h)} s_l \sum_{i=1}^m \sigma_i 1_{\{x_i \in l\}} \right] \quad (19)$$

$$= \frac{\lambda}{m} \mathbb{E}_{\sigma} \left[ \sup_{h \in \mathcal{H}_n, s_l \in \{+1, -1\}} \sum_{i=1}^m \sigma_i \sum_{l \in \text{leaves}(h)} s_l 1_{\{x_i \in l\}} \right] \quad (20)$$

$$\leq \lambda \sqrt{\frac{(4n+2) \log_2(d+2) \log(m+1)}{m}} \quad (21)$$

389 Where  $n$  is the number of internal nodes, and  $d$  is the input data dimension. The inequality (14) is a  
 390 direct application of the Hölder's inequality for dual norms. The inequality (16) uses  $\|\cdot\|_r \leq \|\cdot\|_1$ .  
 391 The equality (18) directly follows from the definition of  $\hat{\sigma}$ . The last inequality (21) follows from the  
 392 fact that the VC-dimension of binary classification trees can be bounded by  $(2n+1) \log_2(d+2)$   
 393 [Mohri et al. \[2012\]](#) and a direct application of Massart's lemma [Massart and Picard \[2007\]](#).  $\square$

## 394 A.2 Proof of Theorem 2

395 **Theorem 2.** Fix  $\rho > 0$ . Let  $\mathcal{H}_k = \mathcal{H}_{n_k, \lambda_k, q_k}$ , where  $(n_k), (\lambda_k)$  are sequences of constraints on  
 396 the number of internal nodes  $n$  and the leaf vector norm  $\|\mathbf{w}\|_q$ . Define  $\mathcal{F} = \text{conv}(\cup_{k=1}^K \mathcal{H}_k)$ . Then,  
 397 for any  $\delta > 0$ , with probability at least  $1 - \delta$  over the draw of a sample  $S$  of size  $m$ , the following  
 398 inequality holds for all  $f = \sum_{t=1}^T \alpha_t h_t \in \mathcal{F}$ :

$$R(f) \leq \hat{R}_{S, \rho}(f) + \frac{4}{\rho} \sum_{t=1}^T \alpha_t \lambda_{I_t} \sqrt{\frac{(4n_{I_t} + 2) \log_2(d+2) \log(m+1)}{m}} + C(m, K),$$

399 where  $I_t$  is the index of the subclass selected at time  $t$  and  $C(m, K) = O\left(\sqrt{\frac{\log(K)}{\rho^2 m}} \log \left[\frac{\rho^2 m}{\log(K)}\right]\right)$ .

400 *Proof.* For this proof we are going to make use of the generalization bounds for broad families of  
 401 real-valued functions given in Theorem 1 of [Cortes et al., 2014]. Adapted to our notation, it states  
 402 that for any  $f$  from a family of real-valued functions  $\mathcal{F}$  that is equal to the convex hull of  $\cup_{k=1}^K \mathcal{H}_k$ ,  
 403 for any  $\delta > 0$  with probability at least  $1 - \delta$  over the choice of sample  $S \sim \mathcal{D}^m$ , the following  
 404 generalization bound holds:

$$R(f) \leq \hat{R}_{S, \rho}(f) + \frac{4}{\rho} \sum_{t=1}^T \alpha_t \mathfrak{R}_m(\mathcal{H}_t) + \frac{2}{\rho} \sqrt{\frac{\log K}{m}} + \sqrt{\left\lceil \frac{4}{\rho^2} \log \left( \frac{\rho m^2}{\log K} \right) \right\rceil \frac{\log K}{m} + \frac{\log(\frac{2}{\delta})}{2m}}.$$

405 where  $\alpha_t$  is are the weights that represent  $f$  in the convex hull of  $\cup_{k=1}^K \mathcal{H}_k$ , that is  $f = \sum_{t=1}^T \alpha_t h_t$   
 406 s.t.  $\alpha = [\alpha_1, \dots, \alpha_T]$  is in the simplex  $\Delta$ . This bound is directly applicable to the Regularized  
 407 Gradient Boosting that we define, since at each boosting round, the algorithm selects a base predictor  
 408  $h_t \in \mathcal{H}_t$ , and multiplies it by a coefficient  $\alpha_t$ . Thus, after  $T$  boosting rounds, we will have obtained  
 409 an ensemble  $f$  such that  $f = \sum_{t=1}^T \alpha_t h_t \in \text{conv}(\cup_{k=1}^K \mathcal{H}_k)$  and  $\alpha$  directly in the simplex  $\Delta$ .

410 Applying the Rademacher complexity bound on the regularized families of regression trees  $\mathcal{H}_{n, \lambda, q}$   
 411 that we derived in Theorem 1 and noting that

$$\frac{2}{\rho} \sqrt{\frac{\log K}{m}} + \sqrt{\left\lceil \frac{4}{\rho^2} \log \left( \frac{\rho m^2}{\log K} \right) \right\rceil \frac{\log K}{m} + \frac{\log(\frac{2}{\delta})}{2m}} = O\left(\sqrt{\frac{\log(K)}{\rho^2 m}} \log \left[\frac{\rho^2 m}{\log(K)}\right]\right) \quad (22)$$

412 We obtain the expression for the bound in Theorem 2. □

## 413 A.3 Proof of Lemma 3

414 **Lemma 3.** Assume that  $\Phi(y, h)$  is differentiable with respect to the second argument, and that  $\frac{\partial \Phi}{\partial h}$   
 415  $C_\Phi(y)$ -Lipschitz with respect to the second argument, for any fixed value  $y$  of the first argument. for  
 416 all  $k \in [0, K]$ , define  $L'_k(\alpha) = \frac{\partial L}{\partial \alpha_k}$ . Then,  $L'_k(\alpha)$  is Lipschitz-continuous with the corresponding  
 417 Lipschitz constants  $C_k$  bounded as follows:

$$C_k \leq \frac{1}{m} \sum_{i=1}^m h_k^2(x_i) C_\Phi(y_i). \quad (23)$$

418 *Proof.* The  $k$ -th derivative of  $L(\alpha)$  is equal to (except  $\alpha_k = 0$ ):

$$L'_k(\alpha) = \frac{1}{m} \sum_{i=1}^m \frac{\partial \Phi}{\partial h} \left( y_i, \sum_{t=1}^T \alpha_t h_t(x_i) \right) h_k(x_i) + c_k, \quad (24)$$

419 where  $c_k = \beta \lambda_k \sqrt{\frac{(4n_k+2) \log_2(d+2) \log(m+1)}{m}}$ . Let  $\mathbf{e}_k$  be the  $k$ -th standard basis vector, then

$$\begin{aligned}
\left| L'_k(\boldsymbol{\alpha}) - L'_k(\boldsymbol{\alpha} + \delta \mathbf{e}_k) \right| &= \left| \frac{1}{m} \sum_{i=1}^m h_k(x_i) \left[ \frac{\partial \Phi}{\partial h} \left( y_i, \sum_{t=1}^T \alpha_t h_t(x_i) \right) - \frac{\partial \Phi}{\partial h} \left( y_i, \sum_{t=1}^T \alpha_t h_t(x_i) + \delta h_k(x_i) \right) \right] \right| \\
&\leq \frac{1}{m} \sum_{i=1}^m |h_k(x_i)| \left| \frac{\partial \Phi}{\partial h} \left( y_i, \sum_{t=1}^T \alpha_t h_t(x_i) \right) - \frac{\partial \Phi}{\partial h} \left( y_i, \sum_{t=1}^T \alpha_t h_t(x_i) + \delta h_k(x_i) \right) \right| \\
&= \frac{1}{m} \sum_{i=1}^m |h_k(x_i)| \left| \frac{\partial \Phi}{\partial h} \left( y_i, f \right) - \frac{\partial \Phi}{\partial h} \left( y_i, f + \delta h_k(x_i) \right) \right| \\
&\leq \frac{1}{m} \sum_{i=1}^m |h_k(x_i)| C_\Phi(y_i) |h_k(x_i)| |\delta| \\
&= \frac{1}{m} \sum_{i=1}^m h_k^2(x_i) C_\Phi(y_i) |\delta|
\end{aligned}$$

Thus,  $L'_k(\boldsymbol{\alpha})$  is Lipschitz-continuous with the corresponding Lipschitz constant bounded by  $\frac{1}{m} \sum_{i=1}^m h_k^2(x_i) C_\Phi(y_i)$ .

□

#### A.4 Proof of Lemma 4

**Lemma 4.** . For each  $k \in [0, K]$  let  $\mathcal{H}_{n_k, \lambda_k, 2}$  be the family of regularized regression trees with  $\|\mathbf{w}\|_2 \leq \lambda_k$  and the number of internal nodes bounded by  $n_k$ . The regularized objective  $L(\boldsymbol{\alpha})$  as in Equation 7 has Lipschitz-continuous derivatives with the coordinate-wise Lipschitz constants  $C_k$  bounded as follows:

$$C_k \leq \lambda_k \left[ \max_{1 \leq i \leq m} C_\Phi(y_i) \right]. \quad (25)$$

*Proof.* For a sample  $S$  and a fixed tree  $h$  let  $\eta_l$  be the number of sample points falling within the leaf  $l$ .

$$\begin{aligned}
C_k &\leq \frac{1}{m} \left[ \max_{1 \leq i \leq m} C_\Phi(y_i) \right] \sum_{i=1}^m h_k^2(x_i) \\
&\leq \frac{1}{m} \left[ \max_{1 \leq i \leq m} C_\Phi(y_i) \right] \sum_{l \in \text{leaves}(h_k)} \eta_l w_l^2 \\
&\leq \frac{1}{m} \left[ \max_{1 \leq i \leq m} C_\Phi(y_i) \right] \|\mathbf{w}\|_2 \max_{l \in \text{leaves}(h_k)} \eta_l \\
&\leq \|\mathbf{w}\|_2 \left[ \max_{1 \leq i \leq m} C_\Phi(y_i) \right] \\
&\leq \lambda_k \left[ \max_{1 \leq i \leq m} C_\Phi(y_i) \right]
\end{aligned}$$

This results in the coordinate sampling distribution for the Randomized Coordinate Descent.

$$p_k = \frac{\lambda_k}{\sum_{j=1}^K \lambda_j} \quad (26)$$

□

**Table 2:** Dataset statistics

|          | <b>sonar</b> | <b>cancer</b> | <b>diabetes</b> | <b>ocr17</b> | <b>ocr49</b> | <b>mnist17</b> | <b>mnist49</b> |
|----------|--------------|---------------|-----------------|--------------|--------------|----------------|----------------|
| Examples | 208          | 699           | 768             | 2000         | 2000         | 15170          | 13782          |
| Features | 60           | 9             | 8               | 196          | 196          | 400            | 400            |

## 432 A.5 Descriptive statistics of the UCI datasets

433 Note that mnist17 and mnist49 refer to the original 20-by-20 pixel datasets, where only two digits  
 434 (1,7 and 4,9 respectively) were sampled. The *cancer* dataset refers to the *breastcancer* dataset in the  
 435 UCI repository.
